# Supplementary material for: Molecular correlates of cisplatin-based chemotherapy response in muscle invasive bladder cancer by integrated multi-omics analysis
Source: PubMed Central journal article supplement (PMC7519650; doi:10.1038/s41467-020-18640-0), 2020-09-25
Supplement: 41467_2020_18640_MOESM3_ESM.pdf [file 41467_2020_18640_MOESM3_ESM.pdf]

## **Description of Additional Supplementary Files**

File Name: Supplementary Data 1

Description: Clinicopathological and treatment data

File Name: Supplementary Data 2

Description: Antibody panels, dilutions and reagents

File Name: Supplementary Data 3

Description: Whole exome sequencing metrics

File Name: Supplementary Data 4

Description: Normalized mRNA read counts
